# Supplementary material
Source: HighWire-hosted journal article supplement (http://www.qdcxjkg.com/highwire/filestream/113679/field_highwire_adjunct_files/0/ERJ-01136-2012_Disclosures.pdf)
Supplement: ERJ-01136-2012_Disclosures.pdf [file ERJ-01136-2012_Disclosures.pdf]

**W. Albrich** received support from BRAHMS Thermo Fisher and from bioMérieux to attend meetings and fulfilled speaking engagements and served as a consultant for BRAHMS Thermo Fisher.

**B. Müller** received support from BRAHMS Thermo Fisher, Roche Viollier and from bioMérieux to attend meetings and fulfilled speaking engagements and served as a consultant for BRAHMS Thermo Fisher. B. Müller also received research support from BRAHMS Thermo Fisher.

**P. Schuetz** received support from BRAHMS Thermo Fisher and from bioMérieux to attend meetings and fulfilled speaking engagements and served as a consultant for BRAHMS Thermo Fisher
